# Supplementary material for: The Multicopy Gene Sly Represses the Sex Chromosomes in the Male Mouse Germline after Meiosis
Source: PLOS journal article supplement (doi:10.1371/journal.pbio.1000244), 2009-11-16

A

DAPI

SLY

SLY + DAPI

DAPI + Lectin

Stage I

WT

shSLY

Stage II-III

WT

shSLY

Stage V

WT

shSLY

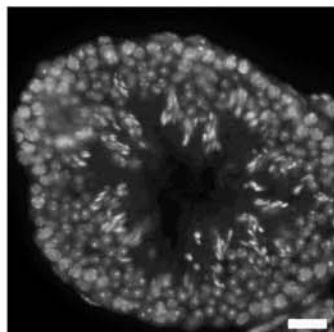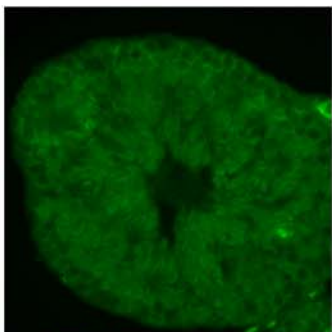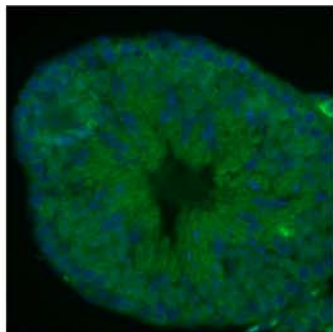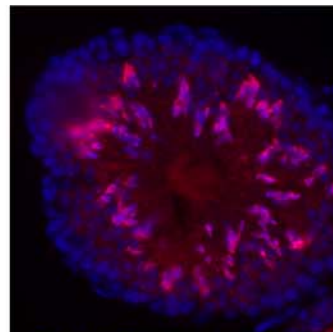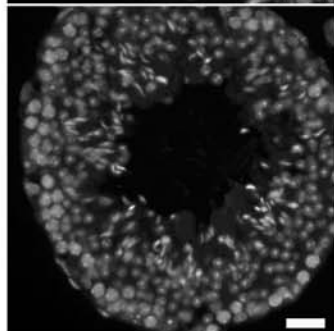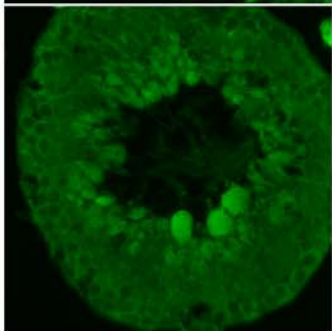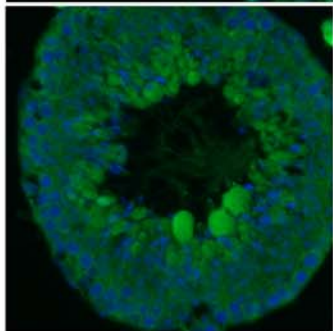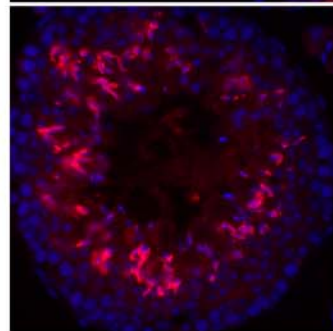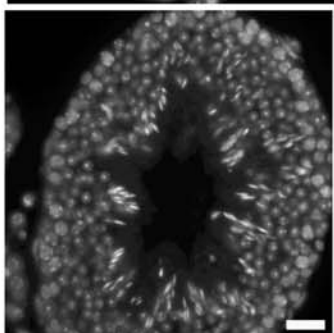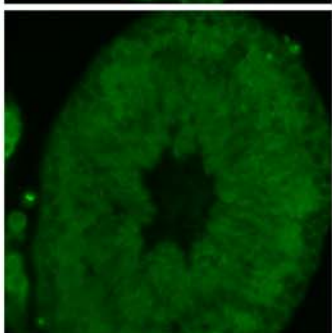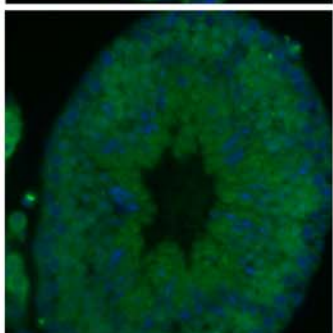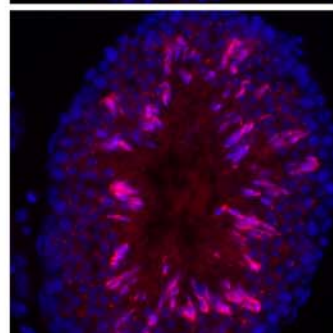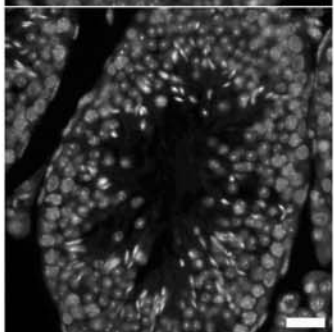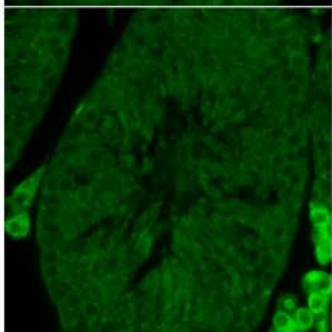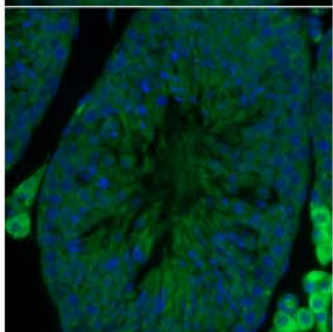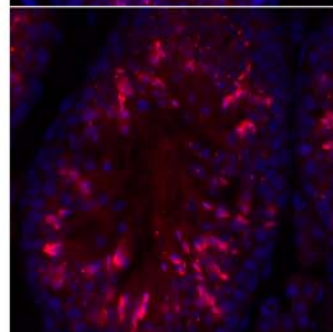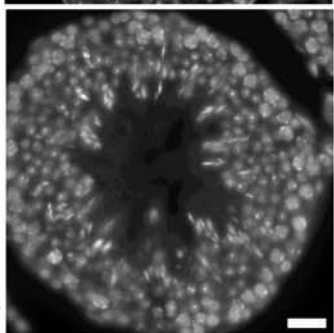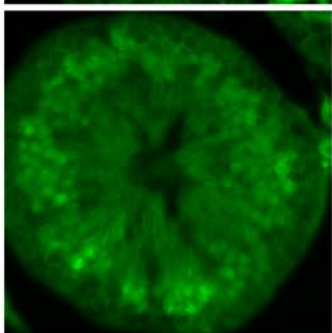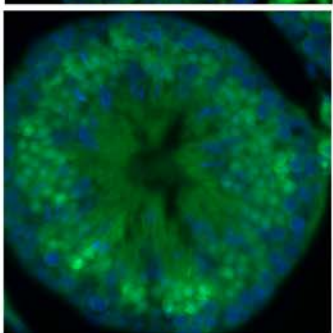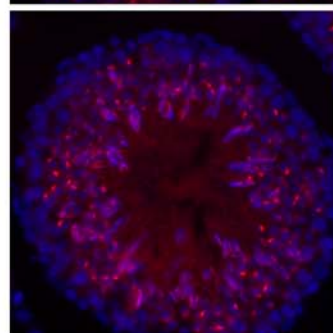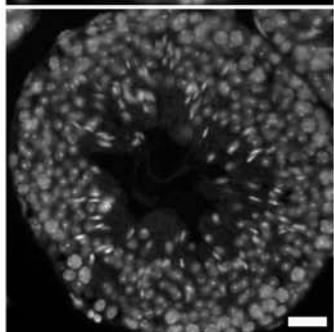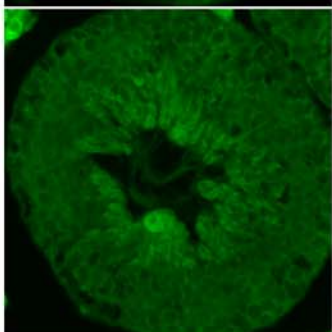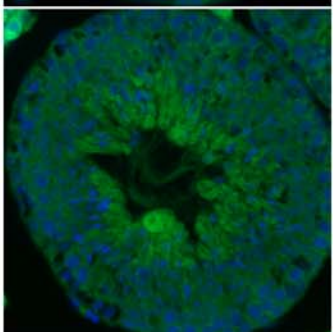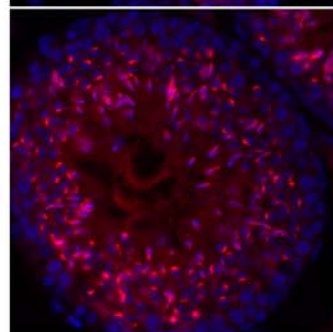



**B**

DAPI

SLY

SLY + DAPI

DAPI + Lectin

Stage VII-VIII

WT

shSLY

Stage IX

WT

shSLY

Stage X-XI

WT

shSLY

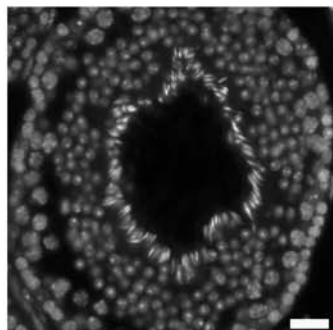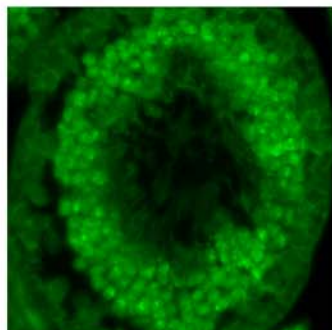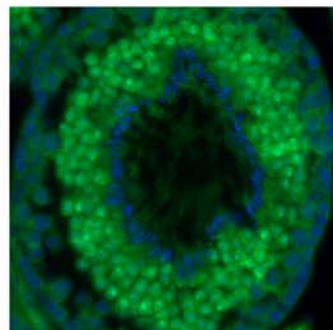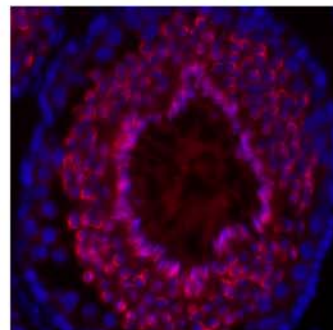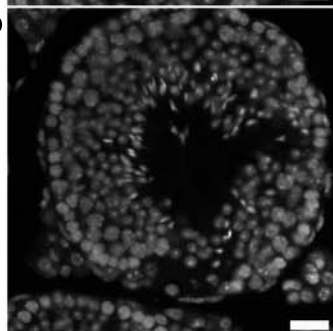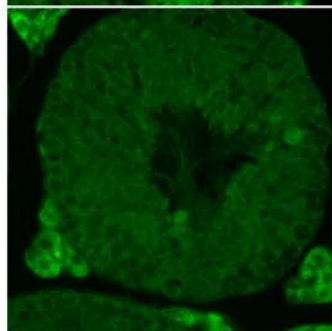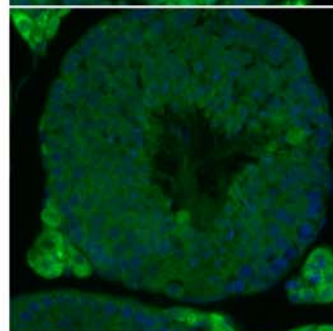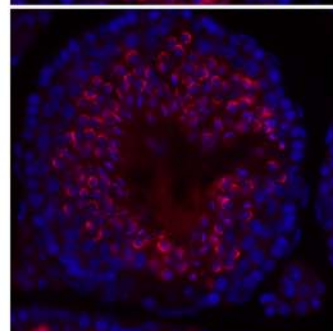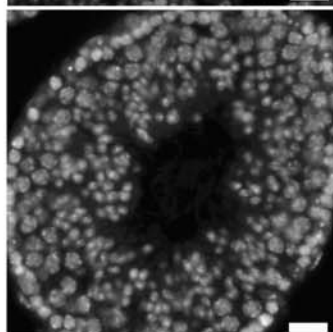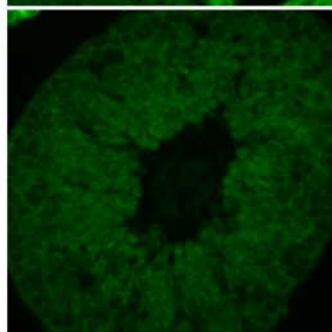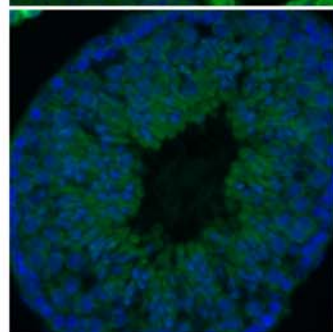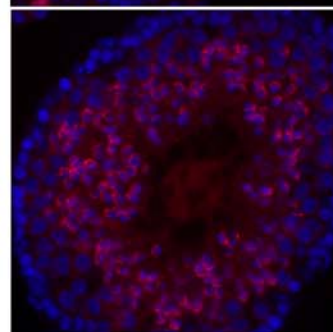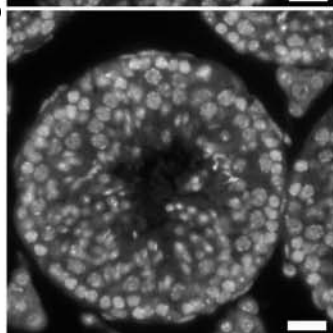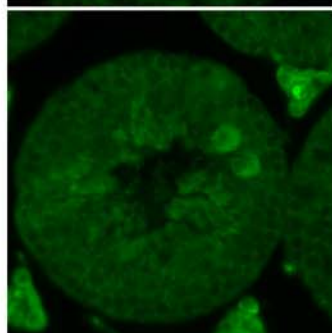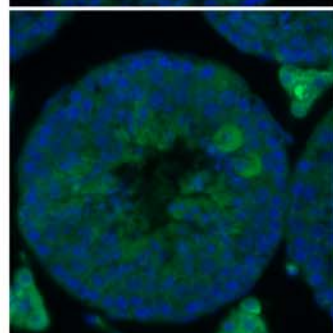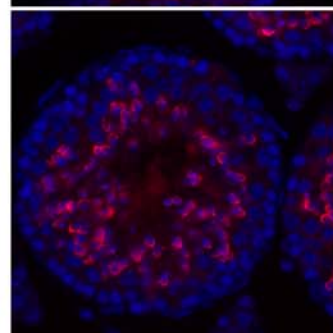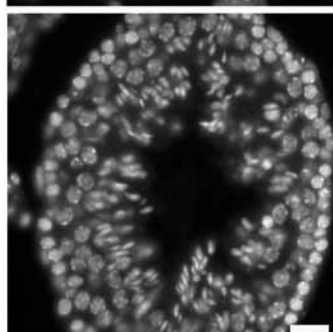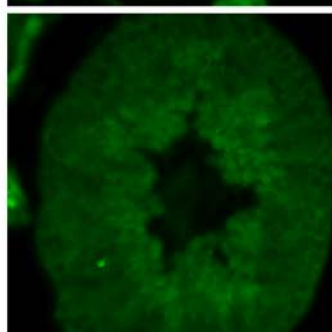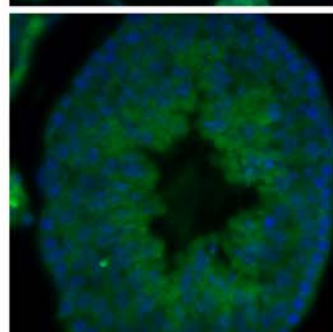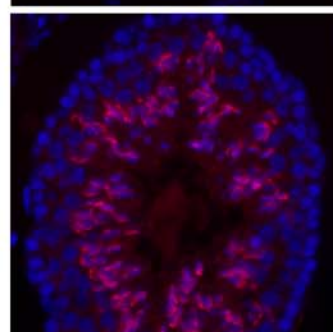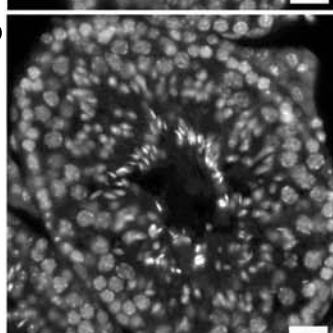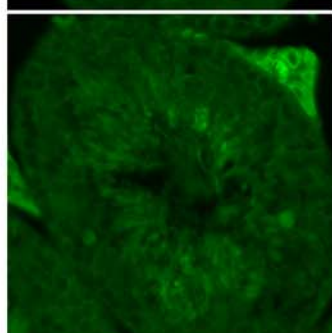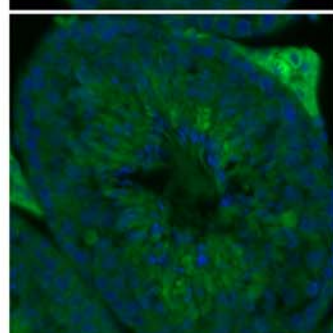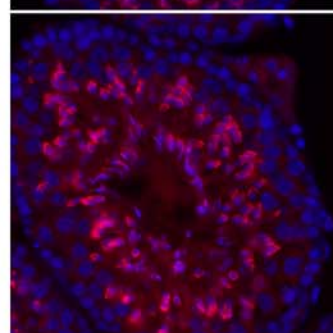



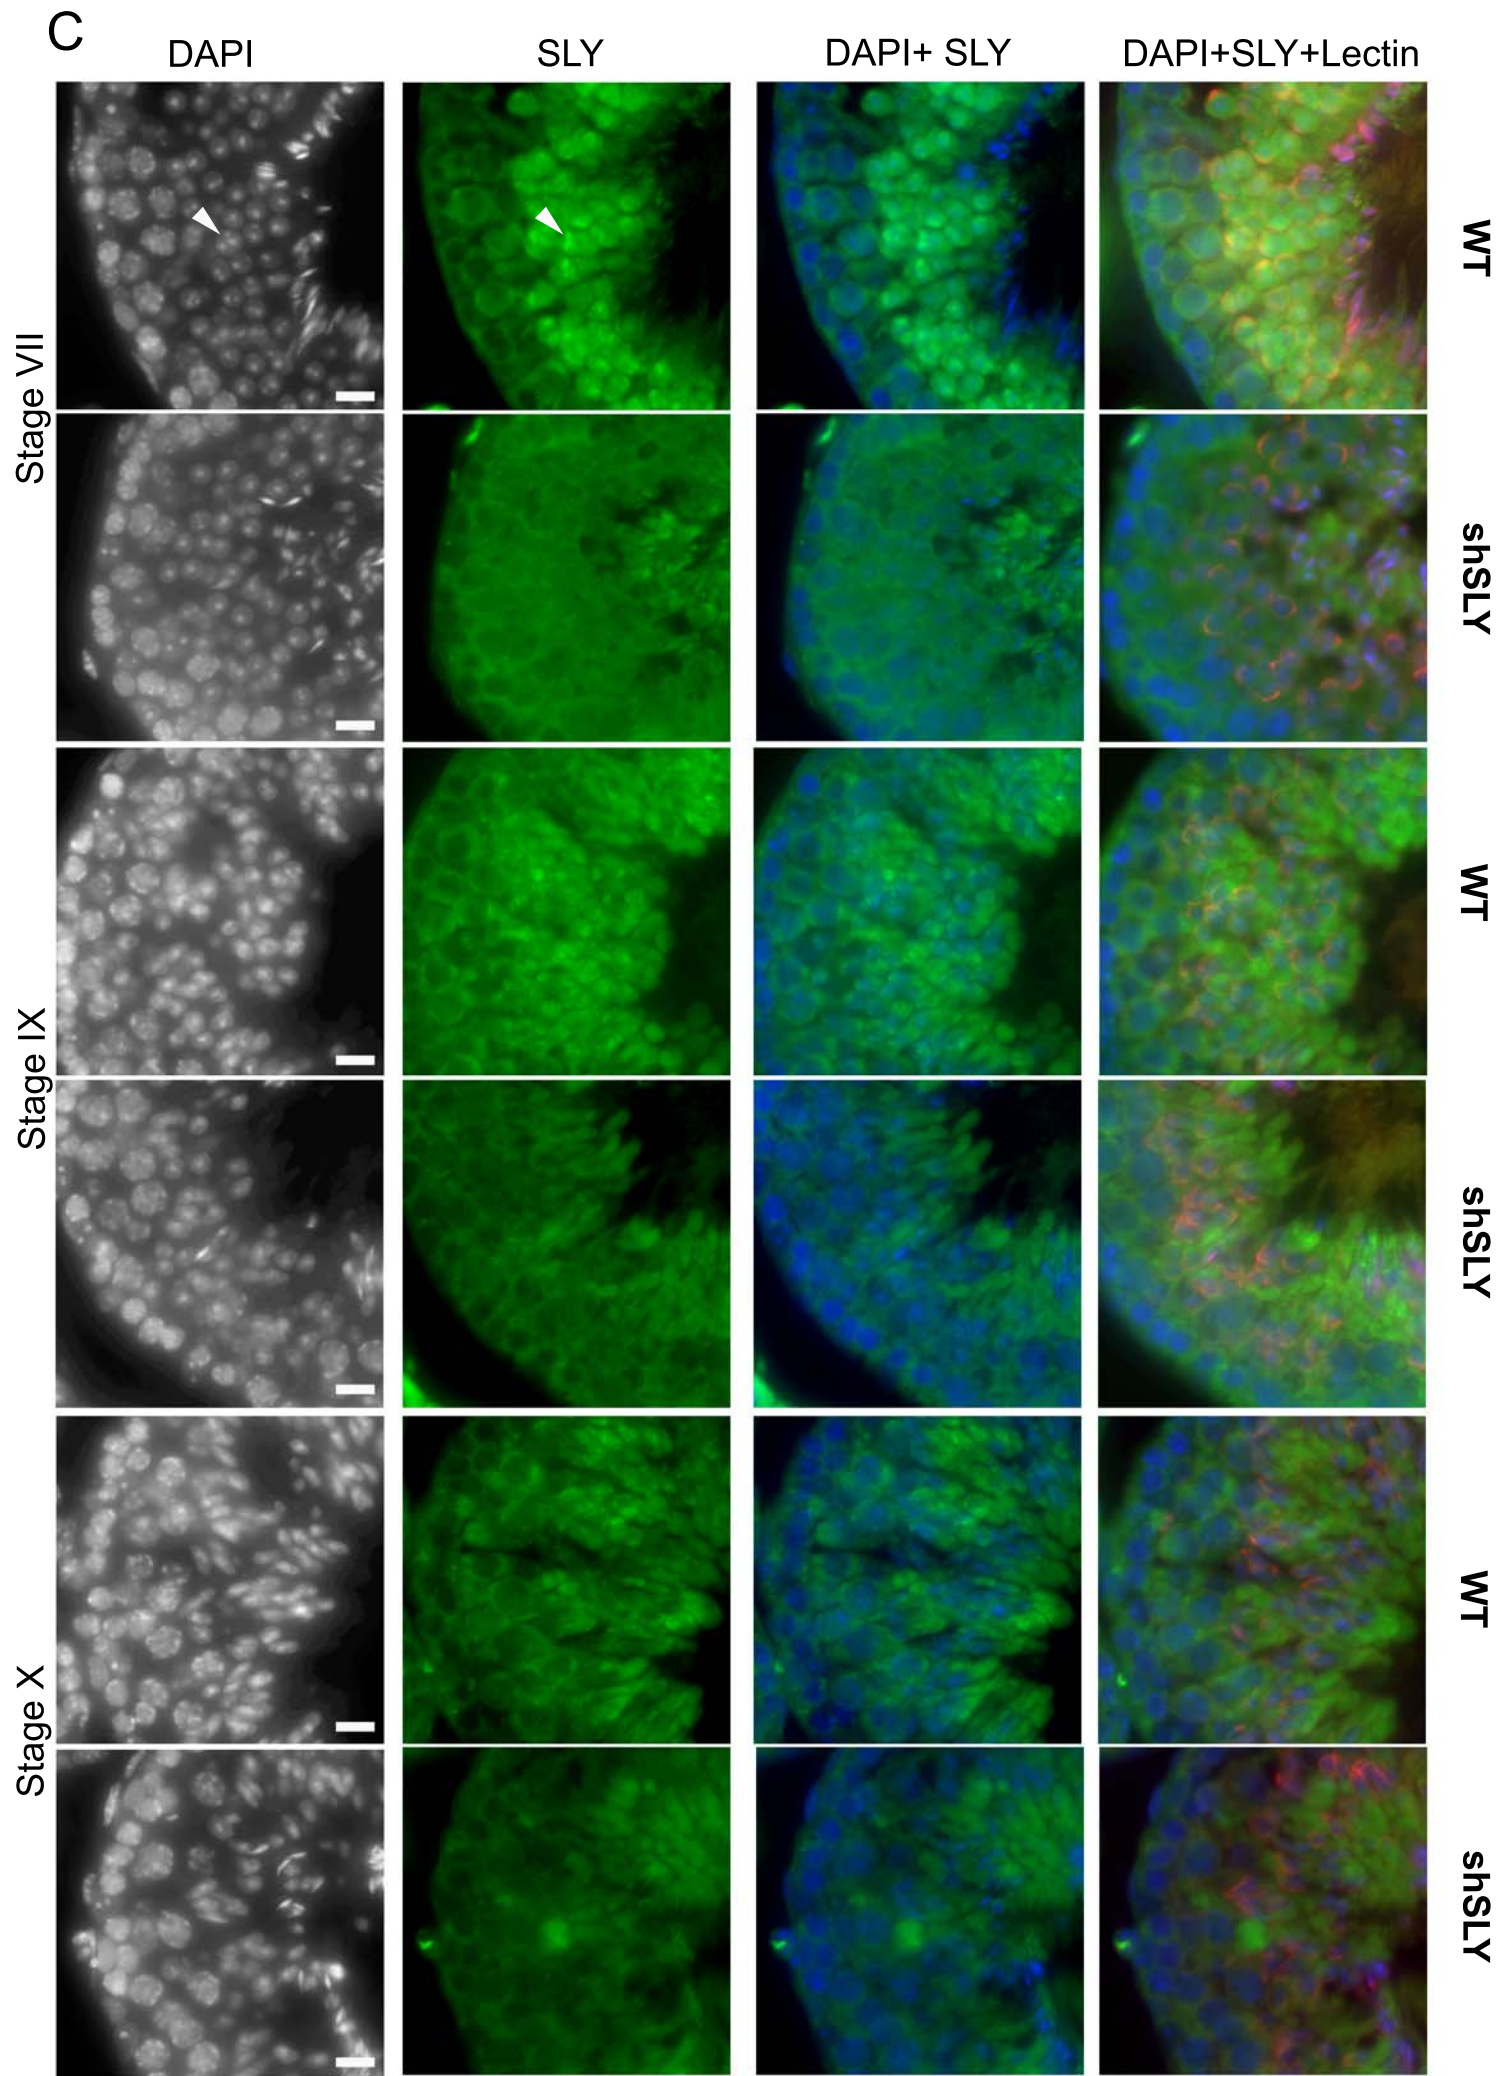

Supplement: S9 (10.1371/journal.pbio.1000244.s009) [file journal.pbio.1000244.s009]
