# Supplementary material for: The Multicopy Gene Sly Represses the Sex Chromosomes in the Male Mouse Germline after Meiosis
Source: PLOS journal article supplement (doi:10.1371/journal.pbio.1000244), 2009-11-16

**% of sperm head abnormalities**

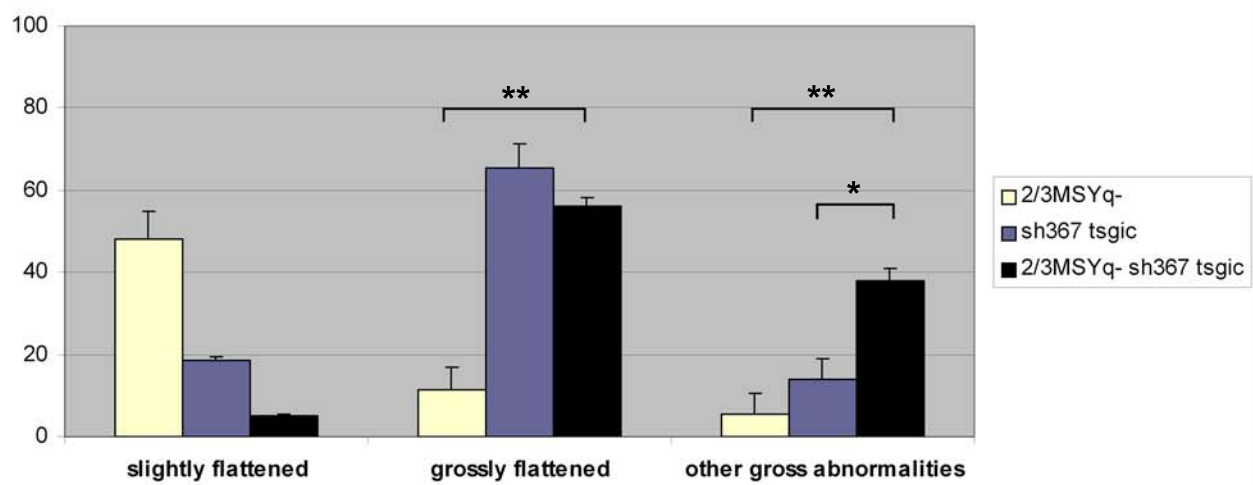

Supplement: S4 (10.1371/journal.pbio.1000244.s004) [file journal.pbio.1000244.s004]
